# Supplementary material
Source: publisher figshare collection journal article supplement (https://tandf.figshare.com/articles/dataset/_/5161609)
Supplement: Supplementary file 1 [file 1]

## Appendix A

### *Summary of SLP Professional Association Scope of Practice Documents*

| Association                                                | Age groups           | SLP Clinical Areas                                                                                                                                                                                                                                                                                                                                                                                                                                                                                                                                                                                                                                                                                                                                                                                                                                                                                                                                                                                                                                                                                                                                                                                                                                                                                                                                                                                                                                                                                                                                                               | Aetiologies/Illnesses                                                                                                                                                                                                                                                                                                                                                                                                                                                                                                                                                                                                                                                                                                                                                                                                                                                                                                                                                                                                                                                                                                                                                                                                                                                                                                                                         |
|------------------------------------------------------------|----------------------|----------------------------------------------------------------------------------------------------------------------------------------------------------------------------------------------------------------------------------------------------------------------------------------------------------------------------------------------------------------------------------------------------------------------------------------------------------------------------------------------------------------------------------------------------------------------------------------------------------------------------------------------------------------------------------------------------------------------------------------------------------------------------------------------------------------------------------------------------------------------------------------------------------------------------------------------------------------------------------------------------------------------------------------------------------------------------------------------------------------------------------------------------------------------------------------------------------------------------------------------------------------------------------------------------------------------------------------------------------------------------------------------------------------------------------------------------------------------------------------------------------------------------------------------------------------------------------|---------------------------------------------------------------------------------------------------------------------------------------------------------------------------------------------------------------------------------------------------------------------------------------------------------------------------------------------------------------------------------------------------------------------------------------------------------------------------------------------------------------------------------------------------------------------------------------------------------------------------------------------------------------------------------------------------------------------------------------------------------------------------------------------------------------------------------------------------------------------------------------------------------------------------------------------------------------------------------------------------------------------------------------------------------------------------------------------------------------------------------------------------------------------------------------------------------------------------------------------------------------------------------------------------------------------------------------------------------------|
| <b>American Speech–Language–Hearing Association (ASHA)</b> | Across the life span | <ol style="list-style-type: none"> <li>1. Fluency <ol style="list-style-type: none"> <li>a. Stuttering</li> <li>b. Cluttering</li> </ol> </li> <li>2. Speech Production <ol style="list-style-type: none"> <li>a. Motor planning and execution</li> <li>b. Articulation</li> <li>c. Phonological</li> </ol> </li> <li>3. Language – Spoken and written language (listening, processing, speaking, reading, writing, pragmatics) <ol style="list-style-type: none"> <li>a. Phonology</li> <li>b. Morphology</li> <li>c. Syntax</li> <li>d. Semantics</li> <li>e. Pragmatics (language use and social aspects of communication)</li> <li>f. Prelinguistic communication (e.g., joint attention, intentionality, communicative signaling)</li> <li>g. Paralinguistic communication (e.g., gestures, signs, body language)</li> <li>h. Literacy (reading, writing, spelling)</li> </ol> </li> <li>4. Cognition <ol style="list-style-type: none"> <li>a. Attention</li> <li>b. Memory</li> <li>c. Problem solving</li> <li>d. Executive functioning</li> </ol> </li> <li>5. Voice <ol style="list-style-type: none"> <li>a. Phonation quality</li> <li>b. Pitch</li> <li>c. Loudness</li> <li>d. Alaryngeal voice</li> </ol> </li> <li>6. Resonance <ol style="list-style-type: none"> <li>a. Hypernasality</li> <li>b. Hyponasality</li> <li>c. Cul-de-sac resonance</li> <li>d. Forward focus</li> </ol> </li> <li>7. Feeding and Swallowing <ol style="list-style-type: none"> <li>a. Oral phase</li> <li>b. Pharyngeal phase</li> <li>c. Esophageal phase</li> </ol> </li> </ol> | <ul style="list-style-type: none"> <li>• Neonatal problems (e.g., prematurity, low birth weight, substance exposure);</li> <li>• Developmental disabilities (e.g., specific language impairment, autism spectrum disorder, dyslexia, learning disabilities, attention-deficit disorder, intellectual disabilities, unspecified neurodevelopmental disorders);</li> <li>• Disorders of aerodigestive tract function (e.g., irritable larynx, chronic cough, abnormal respiratory patterns or airway protection, paradoxical vocal fold motion, tracheostomy);</li> <li>• Oral anomalies (e.g., cleft lip/palate, dental malocclusion, macroglossia, oral motor dysfunction);</li> <li>• Respiratory patterns and compromise (e.g., bronchopulmonary dysplasia, chronic obstructive pulmonary disease);</li> <li>• Pharyngeal anomalies (e.g., upper airway obstruction, velopharyngeal insufficiency/incompetence);</li> <li>• Laryngeal anomalies (e.g., vocal fold pathology, tracheal stenosis);</li> <li>• Neurological disease/dysfunction (e.g., traumatic brain injury, cerebral palsy, cerebrovascular accident, dementia, Parkinson’s disease, and amyotrophic lateral sclerosis);</li> <li>• Psychiatric disorder (e.g., psychosis, schizophrenia);</li> <li>• Genetic disorders (e.g., Down syndrome, fragile X syndrome, Rett syndrome,</li> </ul> |

| Association                                       | Age groups                  | SLP Clinical Areas                                                                                                                                                                                                                                                                                                                                                                                                                        | Aetiologies/Ilnesses                                                                                                                                                                                                                                                                                                                                                                                                                                  |
|---------------------------------------------------|-----------------------------|-------------------------------------------------------------------------------------------------------------------------------------------------------------------------------------------------------------------------------------------------------------------------------------------------------------------------------------------------------------------------------------------------------------------------------------------|-------------------------------------------------------------------------------------------------------------------------------------------------------------------------------------------------------------------------------------------------------------------------------------------------------------------------------------------------------------------------------------------------------------------------------------------------------|
|                                                   |                             | d. Atypical eating (e.g., food selectivity/refusal, negative physiologic response)<br>8. Auditory Habilitation/Rehabilitation<br>a. Speech, language, communication, and listening skills impacted by hearing loss, deafness<br>b. Auditory processing                                                                                                                                                                                    | velocardiofacial syndrome); and<br>• Orofacial myofunctional disorders (e.g., habitual open-mouth posture/nasal breathing, orofacial habits, tethered oral tissues, chewing and chewing muscles, lips and tongue resting position)<br>ASHA note that this list of etiologies is not comprehensive.                                                                                                                                                    |
| <b>Speech Pathology Australia (SPA)</b>           | Newborns through to old age | • Speech<br>• Fluency<br>• Voice<br>• Resonance<br>• Receptive language<br>• Expressive language<br>• Pragmatics and social skills<br>• Cognitive communication<br>• Problem Solving<br>• Emergent literacy and literacy<br>• Sensory awareness<br>• Eating, drinking and swallowing<br>• Alternative and augmentative communication                                                                                                      | A range including:<br>• Developmental delay/disorder<br>• Congenital and/or acquired neurological disorder<br>• Congenital and/or acquired medical conditions<br>• Progressive neurological and medical conditions<br>• Hearing impairment<br>• Vision impairment<br>• Congenital and acquired intellectual disability<br>• Mental health problems<br>• Cultural and linguistic diversity<br>• Trauma<br>• Socio-economic reasons<br>• Unknown origin |
| <b>Speech-Language and Audiology Canada (SAC)</b> | Across the lifespan         | Including, but are not limited to:<br>• Speech sound production;<br>• Resonance;<br>• Voice;<br>• Fluency;<br>• Pre-linguistic communication;<br>• Language comprehension and expression;<br>• Pre-literacy and literacy skills;<br>• Cognitive communication;<br>• Social (pragmatic) communication;<br>• Feeding and swallowing;<br>• Alternative and augmentative communication;<br>• Aural (re)habilitation<br>• Accent modification; | <i>Populations/illnesses not specified</i>                                                                                                                                                                                                                                                                                                                                                                                                            |

| Association                                                        | Age groups                                                   | SLP Clinical Areas                                                                                                                                                                                                                                                                                                                                                                                                                 | Aetiologies/Ilnesses                                                                                                                                                                                                                                                                                                                                                                                                                                                                                                                                                                                                                                                                                                                                                                                                                                                                                                                                                                                                                                               |
|--------------------------------------------------------------------|--------------------------------------------------------------|------------------------------------------------------------------------------------------------------------------------------------------------------------------------------------------------------------------------------------------------------------------------------------------------------------------------------------------------------------------------------------------------------------------------------------|--------------------------------------------------------------------------------------------------------------------------------------------------------------------------------------------------------------------------------------------------------------------------------------------------------------------------------------------------------------------------------------------------------------------------------------------------------------------------------------------------------------------------------------------------------------------------------------------------------------------------------------------------------------------------------------------------------------------------------------------------------------------------------------------------------------------------------------------------------------------------------------------------------------------------------------------------------------------------------------------------------------------------------------------------------------------|
| <b>New Zealand Speech-Language Therapists' Association (NZSTA)</b> | People from neonates through to old age                      | <ul style="list-style-type: none"> <li>• Speech</li> <li>• Fluency</li> <li>• Voice</li> <li>• Resonance</li> <li>• Receptive language</li> <li>• Expressive language</li> <li>• Pragmatics and social skills</li> <li>• Cognitive communication</li> <li>• Emergent literacy to literacy</li> <li>• Sensory awareness</li> <li>• Eating, drinking and swallowing</li> <li>• Alternative and augmentative communication</li> </ul> | <ul style="list-style-type: none"> <li>• Developmental delay/disorder</li> <li>• Congenital and/or acquired neurological disorder</li> <li>• Congenital and/or acquired medical conditions</li> <li>• Progressive neurological and medical conditions</li> <li>• Cultural and linguistic diversity</li> <li>• Congenital and acquired intellectual disability</li> <li>• Mental health problems</li> <li>• Trauma</li> <li>• Socio-economic reasons</li> </ul>                                                                                                                                                                                                                                                                                                                                                                                                                                                                                                                                                                                                     |
| <b>Royal College of Speech and Language Therapists (RCSLT)</b>     | Infants, children, adults with learning difficulties, adults | <ul style="list-style-type: none"> <li>• Acquired speech and language impairments</li> <li>• Developmental or acquired cognitive impairments</li> <li>• Developmental speech and language impairments</li> <li>• Fluency impairments</li> <li>• Swallowing impairments</li> <li>• Voice impairments</li> </ul>                                                                                                                     | <p>Babies</p> <ul style="list-style-type: none"> <li>• Feeding and swallowing difficulties</li> </ul> <p>Children</p> <ul style="list-style-type: none"> <li>• Mild, moderate or severe learning difficulties</li> <li>• Physical disabilities</li> <li>• Language delay</li> <li>• Specific language impairment</li> <li>• Specific difficulties in producing sounds</li> <li>• Hearing impairment</li> <li>• Cleft palate</li> <li>• Stammering</li> <li>• Autism/social interaction difficulties</li> <li>• Dyslexia</li> <li>• Voice disorders</li> <li>• Selective mutism</li> </ul> <p>Adults</p> <ul style="list-style-type: none"> <li>• Communication or eating and swallowing problems following neurological impairments and degenerative conditions, including stroke, head injury, Parkinson's disease and dementia</li> <li>• Head, neck or throat cancer</li> <li>• Voice problems</li> <li>• Mental health issues</li> <li>• Learning difficulties</li> <li>• Physical disabilities</li> <li>• Stammering</li> <li>• Hearing impairment</li> </ul> |

| Association                                                        | Age groups                                                                    | SLP Clinical Areas                                                                                                                                                                                                                                                                                                                                                                                                                                                                                                                                                                                                                                                                                                                                                                                             | Aetiologies/Ilnesses                                                                                                                                                                                                                                                                                                                         |
|--------------------------------------------------------------------|-------------------------------------------------------------------------------|----------------------------------------------------------------------------------------------------------------------------------------------------------------------------------------------------------------------------------------------------------------------------------------------------------------------------------------------------------------------------------------------------------------------------------------------------------------------------------------------------------------------------------------------------------------------------------------------------------------------------------------------------------------------------------------------------------------------------------------------------------------------------------------------------------------|----------------------------------------------------------------------------------------------------------------------------------------------------------------------------------------------------------------------------------------------------------------------------------------------------------------------------------------------|
| <b>Speech-Language and Audiology Canada (SAC)</b>                  | Across the lifespan                                                           | <p>Including, but are not limited to:</p> <ul style="list-style-type: none"> <li>• Speech sound production;</li> <li>• Resonance;</li> <li>• Voice;</li> <li>• Fluency;</li> <li>• Pre-linguistic communication;</li> <li>• Language comprehension and expression;</li> <li>• Pre-literacy and literacy skills;</li> <li>• Cognitive communication;</li> <li>• Social (pragmatic) communication;</li> <li>• Feeding and swallowing;</li> <li>• Alternative and augmentative communication;</li> <li>• Aural (re)habilitation</li> <li>• Accent modification;</li> </ul>                                                                                                                                                                                                                                        | <i>Populations/illnesses not specified</i>                                                                                                                                                                                                                                                                                                   |
| <b>Irish Association of Speech and Language Therapists (IASLT)</b> | Children (from neonates up to & including school age), adolescents and adults | <ul style="list-style-type: none"> <li>• Speech (e.g. articulation)</li> <li>• Voice and resonance</li> <li>• Fluency</li> <li>• Language including receptive and expressive language in oral, written, graphic and manual modalities</li> <li>• Receptive Communication (e.g. sensory losses associated with hearing/ processing difficulty)</li> <li>• Social Skills and Pragmatics</li> <li>• Cognitive-Linguistic aspects of communication/ higher level language</li> <li>• Literacy, written language</li> <li>• Sensory awareness related to communication, eating, drinking and /or swallowing</li> <li>• Eating, drinking, swallowing or other upper aerodigestive functions such as infant feeding and aeromechanical events,</li> <li>• Alternative and Augmentative Communication (AAC)</li> </ul> | <ul style="list-style-type: none"> <li>• Diagnosed impairments, genetic, acquired neurological disorders and medical conditions</li> <li>• Trauma</li> <li>• Acquired Neurology</li> <li>• Developmental Delays</li> <li>• Cultural and Linguistic Diversity</li> <li>• Intellectual Disability</li> <li>• Mental Health problems</li> </ul> |

*Note:* Developed from ASHA (2016), SAC (2016), SPA (2015), Health and Care Professions Council (UK) (2013), NZSTA (2012), IASLT (2006) and RCSLT (2005).
